# Supplementary material
Source: publisher figshare collection journal article supplement (https://tandf.figshare.com/articles/dataset/_/1009013)
Supplement: Supplementary file 1 [file 2]

Web-based Supplementary Materials for “An  
Empirical Bayesian Method for Multivariate  
Meta-analysis with Applications in Clinical Trials”  
by Chen, Luo, Chu, Su, and Nie

**Web Supplement A: Simulation for Single  $2 \times 2$  table**

In this section, we conduct simulation studies using Markov chain Monte Carlo (MCMC) methods to verify the results in equations (4) and (5) empirically. We consider one cohort study<sup>?</sup> in a meta-analysis for the risk of type 2 diabetes mellitus (T2DM) after gestational diabetes mellitus (GDM)<sup>?</sup>. Specifically, 14 out of 47 women with GDM and 3 out of 47 women without GDM developed T2DM. We first impose independent Jeffreys prior (i.e.,  $a_1 = b_1 = a_2 = b_2 = 0.5$ ) on  $p_1$  and  $p_2$  (the probabilities of developing type 2 diabetes among women with and without gestational diabetes). We draw 10,000 samples of  $p_1$  and  $p_2$  independently from Beta(14.5, 33.5) and Beta(3.5, 44.5), respectively. Using each pair of samples  $p_1$  and  $p_2$ , we calculate the relative risk  $\theta = p_1/p_2$  and plot the histograms. We then calculate the density function using equation (4) and overlay the density curve on top of the histograms. Next, we assume  $p_1$  and  $p_2$  follow Samarnov prior with  $a_1 = b_1 = a_2 = b_2 = 0.5$  and  $\rho = 0.5$ . The samples are jointly drawn from the distribution specified by equation (2). Figure 1 shows the histograms based on random samples and the overlaid density functions based on equation (5). The empirical results suggested that the density functions of relative risk are correct.

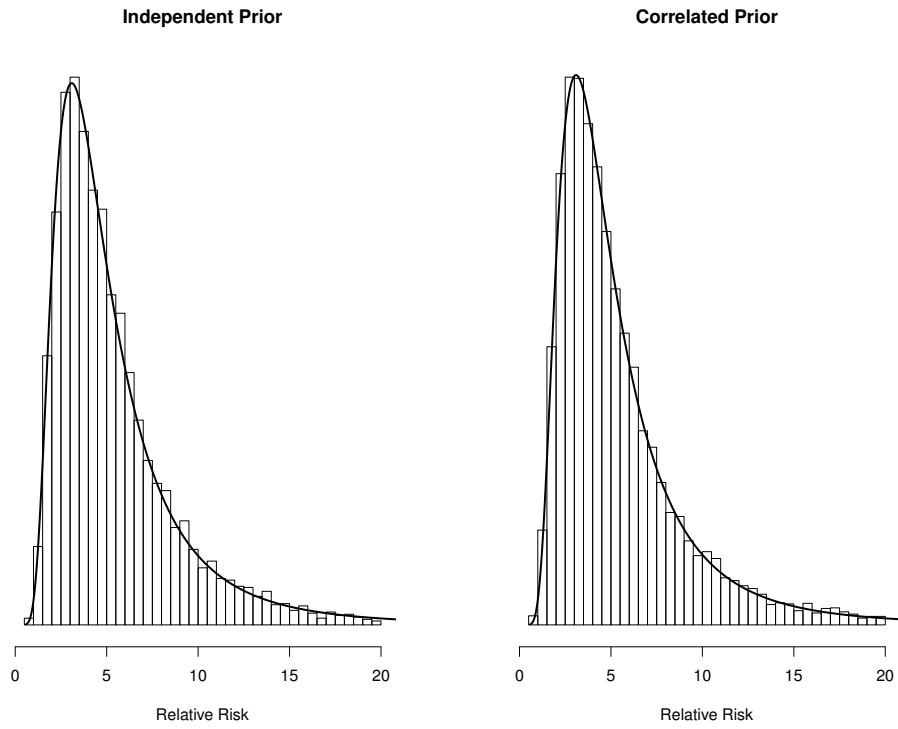

Figure 1: Histograms of 10,000 relative risks samples overlaid with density functions calculated by equations (4) and (5) under independent (left panel) and correlated prior (right panel), respectively.

Table 1: Data from a meta-analysis of 20 studies on the risk of type2 diabetes mellitus (T2DM) after gestational diabetes mellitus (GDM). Last name of the first author and the study year of each study are listed in the first column.

| Author           | T2DM | GDM   | T2DM | no GDM |
|------------------|------|-------|------|--------|
| Feig 2008        | 2874 | 21823 | 6628 | 637341 |
| Lee H 2008       | 71   | 620   | 22   | 868    |
| Madarasz 2008    | 21   | 68    | 0    | 39     |
| Gunderson 2007   | 43   | 166   | 150  | 2242   |
| Vambergue 2007   | 53   | 295   | 1    | 111    |
| Lee 2007         | 405  | 5470  | 16   | 783    |
| Ferraz 2007      | 6    | 70    | 7    | 108    |
| Krishnaveni 2007 | 13   | 35    | 8    | 489    |
| Morimitsu 2007   | 7    | 23    | 0    | 1      |
| Jarvel 2006      | 23   | 435   | 0    | 435    |
| Albareda 2003    | 44   | 696   | 0    | 70     |
| Aberg 2002       | 21   | 229   | 1    | 61     |
| Linne 2002       | 10   | 28    | 0    | 52     |
| Bian 2000        | 15   | 45    | 1    | 39     |
| Ko 1999          | 105  | 801   | 7    | 431    |
| Osei 1998        | 10   | 15    | 0    | 35     |
| Damm 1994        | 33   | 241   | 0    | 57     |
| Benjamin 1993    | 14   | 47    | 3    | 47     |
| O'Sullivan 1991  | 224  | 615   | 18   | 328    |
| Persson 1991     | 5    | 145   | 0    | 41     |
